# Supplementary material for: Refinement and Validation of the Empowerment Audiology Questionnaire: Rasch Analysis and Traditional Psychometric Evaluation
Source: PubMed Central journal article supplement — Ear Hear. 2023 Dec 12;45(3):583–99. doi: 10.1097/AUD.0000000000001449 (PMC11008442; doi:10.1097/aud.0000000000001449), 2023-12-12
Supplement: aud-45-583-s001.pdf [file aud-45-583-s001.pdf]

### Supplemental Digital Content One

List of items rejected from the empowerment PROM, the main reason for rejection, and the corresponding response dependency (item residual correlation) and fit to the Rasch model data (Fit residual, chi-square statistic, ANOVA F statistic) contributing to their ultimate rejection.

| Item | Item Content                                                            | Item rejected in Round | Main reason for rejection                          | Round One - Item residual correlation (correlated item) | Round One - Fit to the Rasch model |        |        | Round Two - Item residual correlation (correlated item) | Round Two - Fit to the Rasch model |       |        |
|------|-------------------------------------------------------------------------|------------------------|----------------------------------------------------|---------------------------------------------------------|------------------------------------|--------|--------|---------------------------------------------------------|------------------------------------|-------|--------|
|      |                                                                         |                        |                                                    |                                                         | FitResid                           | ChiSq  | F-stat |                                                         | FitResid                           | ChiSq | F-stat |
| 2    | I know how to encourage people to speak so that I can hear them clearly | 1                      | Response dependency                                | 0.364 (item 26)                                         | 1.176                              | 5.157  | 0.9528 |                                                         |                                    |       |        |
| 3    | I know how to get help if there are problems with my hearing device(s)  | 1                      | Response dependency; Poor fit; Reversed thresholds | 0.410 (item 4)                                          | -1.045                             | 9.908  | 2.2936 |                                                         |                                    |       |        |
| 5    | I understand what my hearing test results mean                          | 2                      | Reversed thresholds                                |                                                         |                                    |        |        | n/a*                                                    | -1.067                             | 2.49  | 0.5723 |
| 6    | I understand information given to me by my hearing care professional    | 1                      | Response dependency; Poor fit                      | 0.444 (item 5)                                          | -2.265                             | 13.033 | 3.5012 |                                                         |                                    |       |        |
| 9    | I know how to clean, care and maintain my                               | 1                      | Response dependency                                | 0.594 (item 15)                                         | -0.375                             | 2.633  | 0.5855 |                                                         |                                    |       |        |

|    |                                                                                                         |   |                               |                                  |        |        |        |      |  |       |        |       |
|----|---------------------------------------------------------------------------------------------------------|---|-------------------------------|----------------------------------|--------|--------|--------|------|--|-------|--------|-------|
|    | hearing device(s) and accessories                                                                       |   |                               |                                  |        |        |        |      |  |       |        |       |
| 10 | I know what situations are challenging and difficult for me to hear in (e.g. in crowds, in the car)     | 2 | Poor fit; Reversed thresholds |                                  |        |        |        | n/a* |  | 1.385 | 12.322 | 2.239 |
| 12 | I search for other ways to help me communicate when I need to (e.g. look online or ask a friend)        | 1 | Response dependency; Poor fit | 0.372 (item 11); 0.615 (item 14) | 3.445  | 11.147 | 1.6446 |      |  |       |        |       |
| 13 | I use tactics to help me cope with challenges related to my hearing loss (e.g. overcoming frustration)  | 1 | Response dependency; Poor fit | 0.461 (item 14)                  | 1.244  | 7.313  | 1.4038 |      |  |       |        |       |
| 16 | I work with my hearing care professional to make decisions about my hearing care (e.g. hearing devices) | 1 | Response dependency; Poor fit | 0.420 (item 17); 0.356 (item 18) | -1.825 | 5.971  | 1.4773 |      |  |       |        |       |
| 18 | I ask my hearing care professional to adjust my hearing device(s) when needed                           | 1 | Response dependency; Poor fit | 0.356 (item 16); 0.537 (item 17) | 2.241  | 1.004  | 0.2406 |      |  |       |        |       |

|    |                                                                                                                         |   |                               |                                  |        |         |         |      |       |        |        |
|----|-------------------------------------------------------------------------------------------------------------------------|---|-------------------------------|----------------------------------|--------|---------|---------|------|-------|--------|--------|
| 19 | I ask my hearing care professional to give me information in another way when needed (e.g. written, diagrams, videos)   | 2 | Missing responses             |                                  |        |         |         | n/a* | 2.218 | 16.181 | 3.0014 |
| 21 | My hearing loss stops me from feeling included in my social activities                                                  | 1 | Response dependency; Poor fit | 0.899 (item 22)                  | 11.153 | 190.202 | 16.3835 |      |       |        |        |
| 24 | I make the day-to-day decisions about my hearing device(s) (e.g. whether I wear it, how I set it)                       | 2 | Poor fit; Reversed thresholds |                                  |        |         |         | n/a* | 0.032 | 26.325 | 5.7431 |
| 27 | I am confident I can use my hearing device(s) properly                                                                  | 1 | Response dependency; Poor fit | 0.444 (item 22)                  | -2.45  | 17.733  | 4.4316  |      |       |        |        |
| 29 | I am confident talking with my hearing care professional about any problems I have with my hearing or hearing device(s) | 1 | Response dependency; Poor fit | 0.352 (item 17)                  | -2.064 | 16.601  | 4.264   |      |       |        |        |
| 30 | I am confident making decisions about my hearing care                                                                   | 1 | Response dependency; Poor fit | 0.306 (item 22); 0.334 (item 27) | -3.141 | 24.163  | 6.9109  |      |       |        |        |

|    |                                                                                         |   |                               |                 |        |        |        |  |  |  |  |
|----|-----------------------------------------------------------------------------------------|---|-------------------------------|-----------------|--------|--------|--------|--|--|--|--|
| 32 | I ask for additional information from my hearing care professional when needed          | 1 | Response dependency; Poor fit | 0.345 (item 31) | -1.233 | 16.349 | 3.7286 |  |  |  |  |
| 33 | I have the confidence to tell people that I have hearing loss and what I need from them | 1 | Response dependency           | 0.374 (item 26) | 0.52   | 5.19   | 1.1319 |  |  |  |  |

n/a\* = the item residual correlation was below 0.3
