# Supplementary material for: Refinement and Validation of the Empowerment Audiology Questionnaire: Rasch Analysis and Traditional Psychometric Evaluation
Source: PubMed Central journal article supplement — Ear Hear. 2023 Dec 12;45(3):583–99. doi: 10.1097/AUD.0000000000001449 (PMC11008442; doi:10.1097/aud.0000000000001449), 2023-12-12

## Supplemental Digital Content Two

The wording of Study 1 item 20 “My hearing loss stops me from taking part in social activities” was changed to “My hearing loss doesn’t stop me from taking part in social activities” (Study 2: item 9 in the EmpAQ-15 and item 3 in the EmpAQ-5). These graphs demonstrate the improved fit to the model and functionality of the response categories.

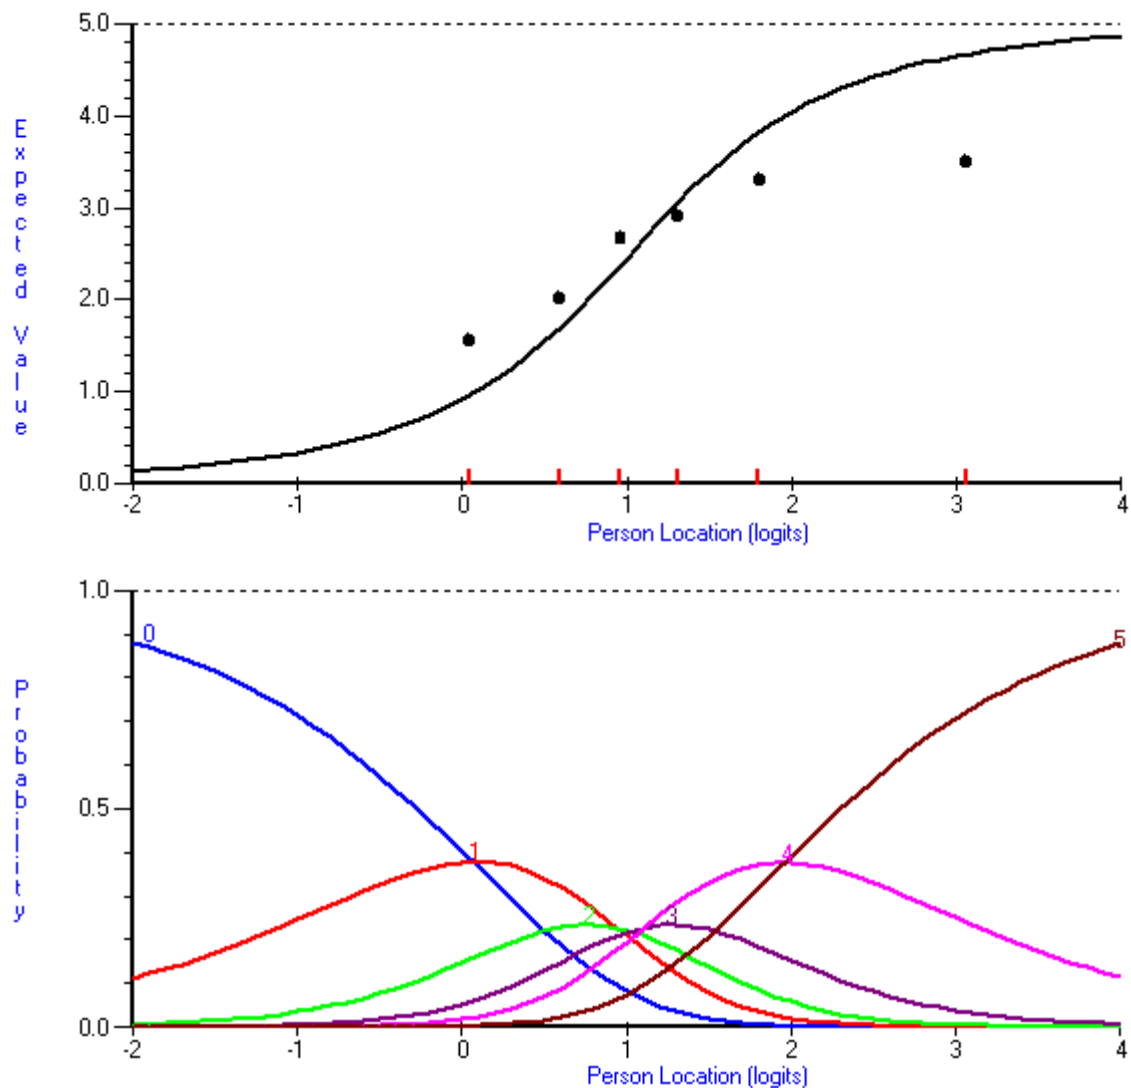

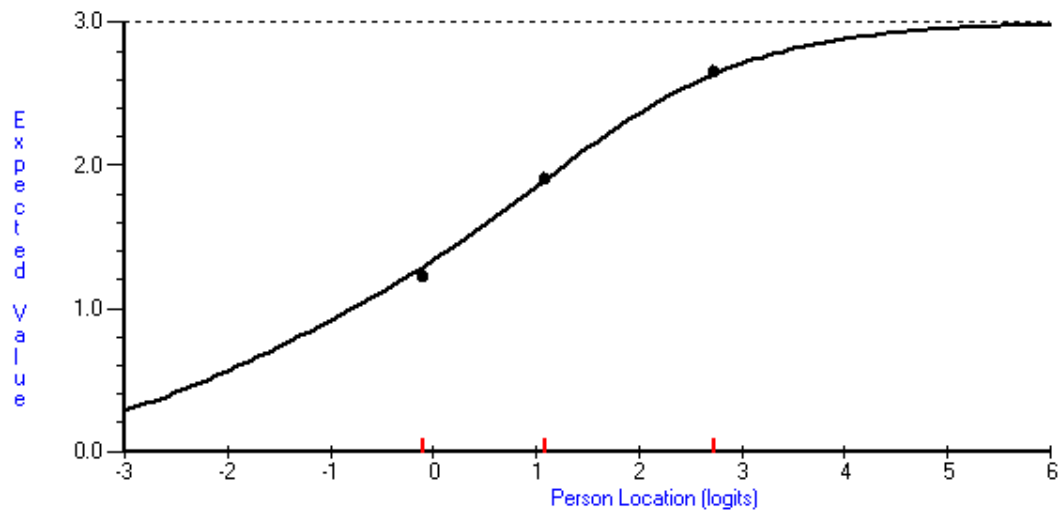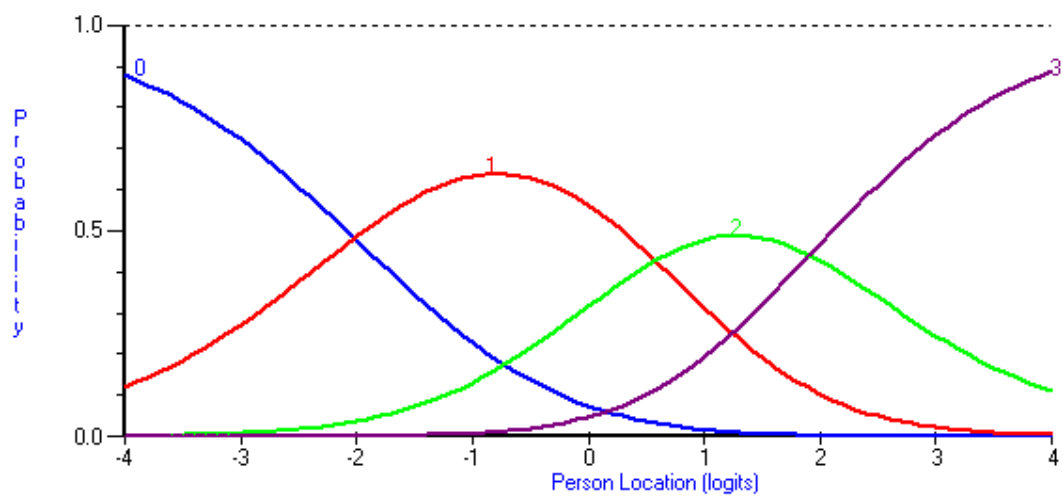

Supplement: aud-45-583-s002.pdf [file aud-45-583-s002.pdf]
