# Supplementary material for: Refinement and Validation of the Empowerment Audiology Questionnaire: Rasch Analysis and Traditional Psychometric Evaluation
Source: PubMed Central journal article supplement — Ear Hear. 2023 Dec 12;45(3):583–99. doi: 10.1097/AUD.0000000000001449 (PMC11008442; doi:10.1097/aud.0000000000001449), 2023-12-12

## Supplemental Digital Content Three

Person item threshold distribution graphs for the 5-item and 15-item scales.

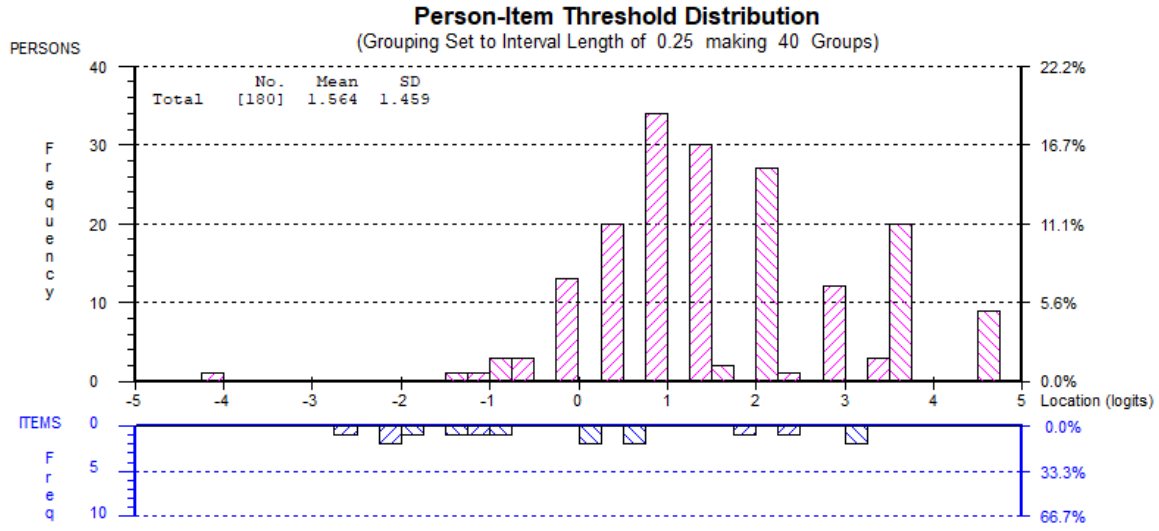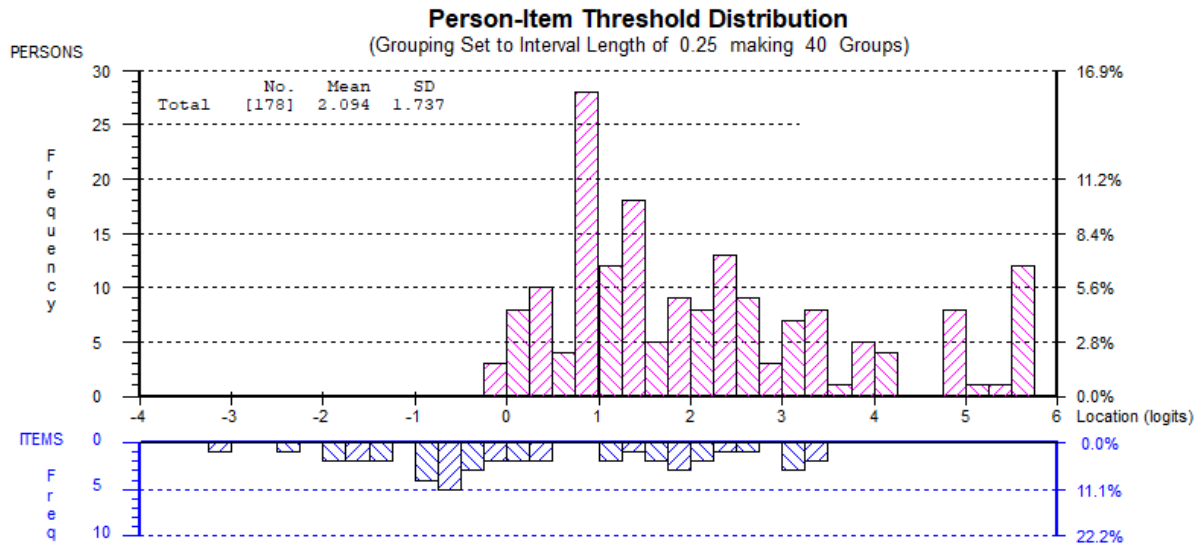

Supplement: aud-45-583-s003.pdf [file aud-45-583-s003.pdf]
